# Supplementary material for: Astaxanthin Prevents Mitochondrial Impairment Induced by Isoproterenol in Isolated Rat Heart Mitochondria
Source: PubMed Central journal article supplement (PMC7139515; doi:10.3390/antiox9030262), 2020-03-23
Supplement: antioxidants-09-00262-s001.pdf [file antioxidants-09-00262-s001.pdf]

To Fig 3.

|        | CV      |         |         |         | CIII    |         |         |         | CIV     |         |         |         | CII     |         |         |         | CI      |         |         |         |
|--------|---------|---------|---------|---------|---------|---------|---------|---------|---------|---------|---------|---------|---------|---------|---------|---------|---------|---------|---------|---------|
|        | group 1 | group 2 | group 3 | group 4 | group 1 | group 2 | group 3 | group 4 | group 1 | group 2 | group 3 | group 4 | group 1 | group 2 | group 3 | group 4 | group 1 | group 2 | group 3 | group 4 |
| Mean 1 | 1,3     | 0,936   | 0,845   | 1,261   | 1,2587  | 1,1229  | 0,9502  | 1,234   | 1,8905  | 2,388   | 0,9751  | 1,3731  | 0,8463  | 1,001   | 0,4732  | 1,001   | 0,8463  | 1,001   | 0,4732  | 1,001   |
| Mean 2 | 1,326   | 1,209   | 0,793   | 1,196   | 1,16    | 1,1229  | 0,8761  | 1,0859  | 2,0829  | 2,3084  | 1,0149  | 1,592   | 0,9919  | 1,0556  | 0,6643  | 0,9009  | 0,9919  | 1,0556  | 0,6643  | 0,9009  |
| Mean 3 | 1,404   | 1,157   | 1,092   | 1,17    | 1,1476  | 0,9625  | 0,8638  | 1,0612  | 2,0696  | 2,4875  | 1,194   | 1,4527  | 0,9282  | 1,1375  | 0,7644  | 0,9555  | 0,9282  | 1,1375  | 0,7644  | 0,9555  |
| Mean 4 | 1,339   | 1,287   | 1,014   | 1,313   | 1,2217  | 1,0366  | 0,9995  | 1,1476  | 2,0895  | 2,7263  | 1,194   | 1,4527  | 0,9464  | 1,001   | 0,637   | 1,001   | 0,9464  | 1,001   | 0,637   | 1,001   |

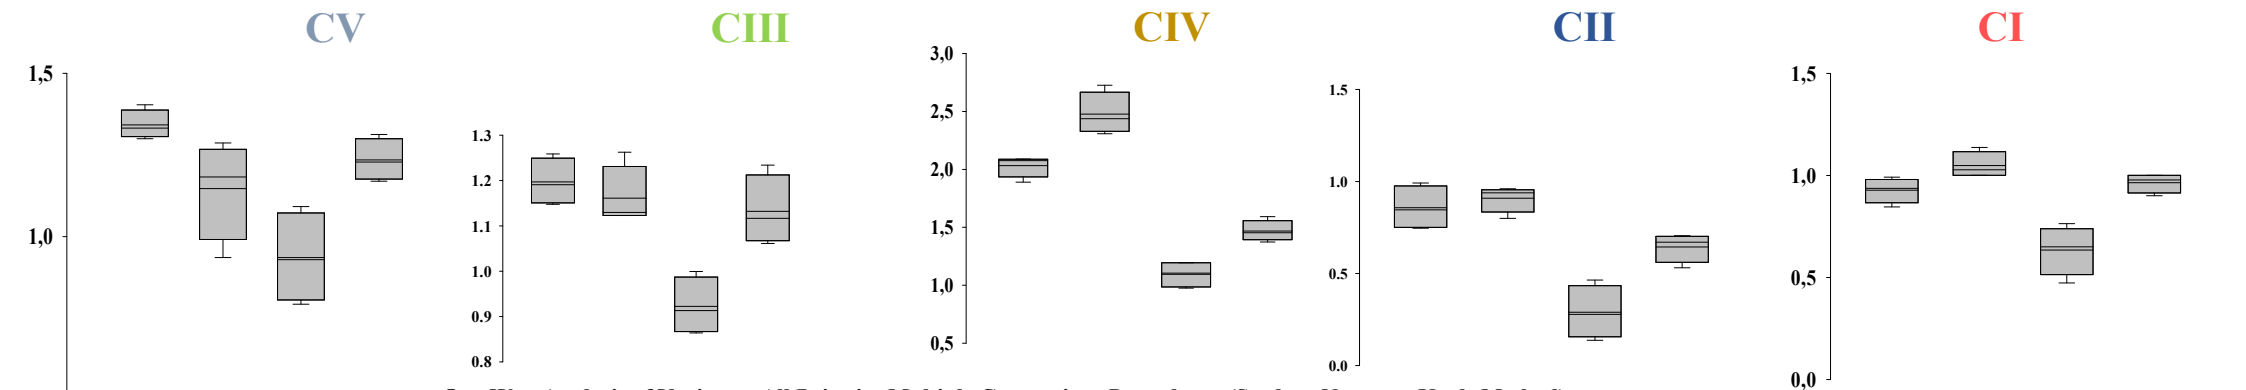

One Way Analysis of Variance All Pairwise Multiple Comparison Procedures (Student-Newman-Keuls Method) :

| Comparison                | Diff of Means | P<0,050     |
|---------------------------|---------------|-------------|
| CV group 1 vs. CV group 3 | 0,406         | Yes         |
| CV group 1 vs. CV group2  | 0,195         | No          |
| CV group 1 vs. CV group 4 | 0,107         | No          |
| CV group 4 vs. CV group 3 | 0,299         | Yes         |
| CV group 4 vs. CV group2  | 0,0877        | Do Not Test |
| CV group2 vs. CV group 3  | 0,211         | Do Not Test |

| Comparison                      | Diff of Means | P<0.050 |
|---------------------------------|---------------|---------|
| C III group 1 vs. C III group 3 | 0.275         | Yes     |
| C III group 1 vs. C III group 2 | 0.21          | No      |
| C III group 1 vs. C III group 4 | 0.139         | No      |
| C III group 4 vs. C III group 3 | 0.136         | Yes     |
| C III group 4 vs. C III group 2 | 0.071         | ---     |
| C III group 2 vs. C III 3group  | 0.0648        | ---     |

| Comparison                    | Diff of Means | P<0.050 |
|-------------------------------|---------------|---------|
| C IV group 1 vs. C IV group 3 | 0.939         | Yes     |
| C IV group 1 vs. C IV group 2 | 0.248         | Yes     |
| C IV group 1 vs. C IV group 4 | 0.565         | Yes     |
| C IV group 4 vs. C IV group 3 | 0.373         | Yes     |
| C IV group 4 vs. C IV group 2 | 1.01          | ---     |
| C IV group 2 vs. C IV group 3 | 1.383         | ---     |

| Comparison                    | Diff of Means | P<0.050 |
|-------------------------------|---------------|---------|
| C II group 1 vs. C II group 3 | 0.568         | Yes     |
| C II group 1 vs. C II group 2 | 0.0518        | No      |
| C II group 1 vs. C II group 4 | 0.214         | Yes     |
| C II group 4 vs. C II group 3 | 0.355         | Yes     |
| C II group 4 vs. C II group 2 | 0.265         | ---     |
| C II group 2 vs. C II group 3 | 0.62          | ---     |

| Comparison                  | Diff of Means | P<0.050 |
|-----------------------------|---------------|---------|
| C I group 1 vs. C I group 3 | 0.293         | Yes     |
| C I group 1 vs. C I group 2 | 0.121         | No      |
| C I group 1 vs. C I group 4 | 0.0364        | No      |
| C I group 4 vs. C I group 3 | 0.33          | Yes     |
| C I group 4 vs. C I group 2 | 0.0842        | ---     |
| C I group 2 vs. C I group 3 | 0.414         | ---     |

To Fig 4.

|        | CNPase  |         |         |         | ANT     |         |         |         | Cyc D   |         |         |         | SOD2    |         |         |         |
|--------|---------|---------|---------|---------|---------|---------|---------|---------|---------|---------|---------|---------|---------|---------|---------|---------|
|        | group 1 | group 2 | group 3 | group 4 | group 1 | group 2 | group 3 | group 4 | group 1 | group 2 | group 3 | group 4 | group 1 | group 2 | group 3 | group 4 |
| Mean 1 | 0,9016  | 0,728   | 1,212   | 1,334   | 1,1776  | 1,296   | 0,4352  | 0,896   | 0,7566  | 0,585   | 0,7371  | 0,4524  | 0,9918  | 0,8178  | 0,4593  | 1,3439  |
| Mean 2 | 0,882   | 0,4968  | 0,9936  | 1,564   | 1,2672  | 1,216   | 0,256   | 0,96    | 0,7176  | 0,6084  | 0,7098  | 0,429   | 0,9803  | 1,1998  | 0,5072  | 1,2233  |
| Mean 3 | 0,9199  | 0,69    | 1,258   | 1,288   | 1,2928  | 1,1416  | 0,3584  | 0,8704  | 0,7956  | 0,6006  | 0,8346  | 0,3744  | 0,98    | 0,9248  | 0,5485  | 1,2795  |
| Mean 4 | 1,0568  | 0,7912  | 1,2992  | 1,472   | 1,3312  | 1,2544  | 0,4096  | 0,8704  | 0,7878  | 0,6864  | 0,7956  | 0,3978  | 0,8799  | 0,8267  | 0,6499  | 1,3463  |

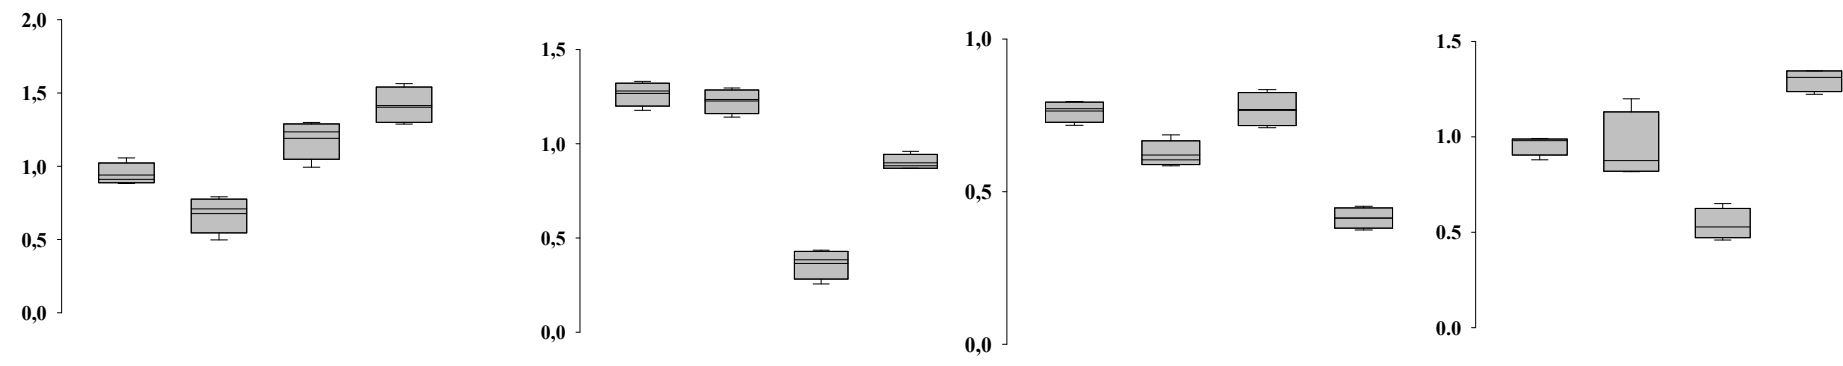

One Way Analysis of Variance All Pairwise Multiple Comparison Procedures (Student-Newman-Keuls Method) :

| Comparison                        | Diff of Means | P<0.05 |
|-----------------------------------|---------------|--------|
| CNPase group 1 vs. CNPase group 3 | 0.251         | Yes    |
| CNPase group 1 vs. CNPase group 2 | 0.264         | Yes    |
| CNPase group 1 vs. CNPase group 4 | 0.474         | Yes    |
| CNPase group 4 vs. CNPase group 3 | 0.224         | Yes    |

| Comparison                  | Diff of Means | P<0.050 |
|-----------------------------|---------------|---------|
| ANT group 1 vs. ANT group 3 | 0.902         | Yes     |
| ANT group 1 vs. ANT group 2 | 0.0402        | No      |
| ANT group 1 vs. ANT group 4 | 0.368         | Yes     |
| ANT group 4 vs. ANT group 3 | 0.534         | Yes     |

| Comparison                      | Diff of Means | P<0.050 |
|---------------------------------|---------------|---------|
| CyP-D group 1 vs. CyP-D group 3 | 0.00487       | No      |
| CyP-D group 1 vs. CyP-D group 2 | 0.144         | Yes     |
| CyP-D group 1 vs. CyP-D group 4 | 0.351         | Yes     |
| CyP-D group 4 vs. CyP-D group 3 | 0.356         | Yes     |

| Comparison                    | Diff of Means | P<0.050 |
|-------------------------------|---------------|---------|
| SOD2 group 1 vs. SOD2 group 3 | 0.417         | Yes     |
| SOD2 group 1 vs. SOD2 group 2 | 0.0157        | No      |
| SOD2 group 1 vs. SOD2 group 4 | 0.34          | Yes     |
| SOD2 group 4 vs. SOD2 group 3 | 0.757         | Yes     |

To Fig 5. Activity I complex

ANT I complex

Cyc D I complex

NDUFB8 I complex

|        | group 1 | group 2 | group 3 | group 4 | group 1 | group 2 | group 3 | group 4 | group 1 | group 2 | group 3 | group 4 | group 1 | group 2 | group 3 | group 4 |
|--------|---------|---------|---------|---------|---------|---------|---------|---------|---------|---------|---------|---------|---------|---------|---------|---------|
| Mean 1 | 2,641   | 2,641   | 2,085   | 2,4464  | 0,8148  | 2,3086  | 0,1649  | 1,261   | 1,9306  | 1,0835  | 0,3349  | 0,985   | 0,817   | 0,9546  | 0,4988  | 0,8256  |
| Mean 2 | 2,4742  | 2,7522  | 1,3344  | 2,502   | 0,8245  | 2,1243  | 0,1746  | 1,1349  | 1,9897  | 1,2017  | 0,3546  | 1,0244  | 0,8342  | 0,8342  | 0,5074  | 0,9546  |
| Mean 3 | 2,98    | 2,8634  | 1,6402  | 2,4742  | 1,067   | 2,4929  | 0,3589  | 1,3095  | 2,167   | 1,1426  | 0,4925  | 0,8865  | 0,8944  | 0,9116  | 0,559   | 0,8514  |
| Mean 4 | 2,9912  | 2,8356  | 1,6988  | 2,2796  | 1,1446  | 2,4153  | 0,2716  | 1,5229  | 2,0094  | 1,379   | 0,5713  | 0,8865  | 0,86    | 0,8514  | 0,5676  | 0,8084  |

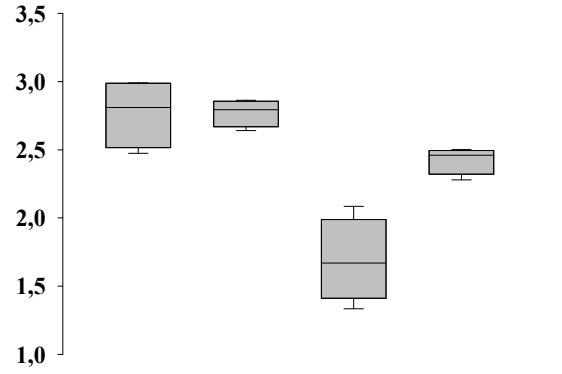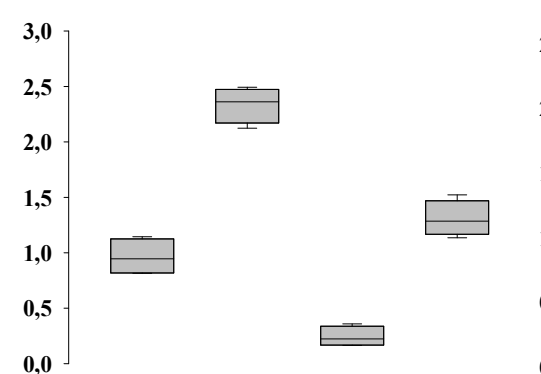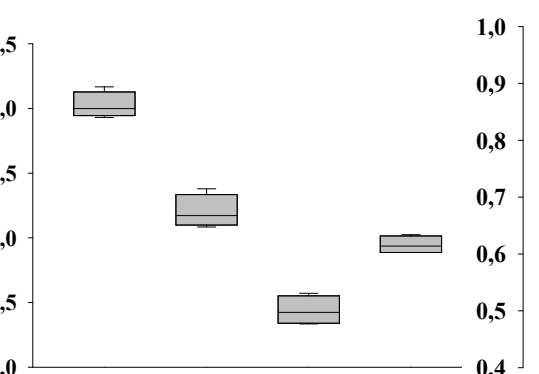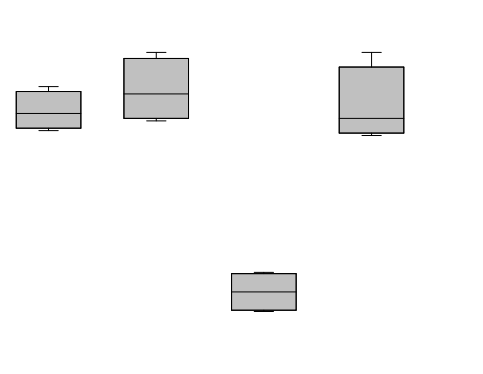

One Way Analysis of Variance All Pairwise Multiple Comparison Procedures (Student-Newman-Keuls Method) :

| Comparison                                    | Diff of Means | P<0.050 |
|-----------------------------------------------|---------------|---------|
| activity C I group 1 vs. activity C I group 3 | 1.082         | Yes     |
| activity C I group 1 vs. activity C I group 2 | 0.00145       | No      |
| activity C I group 1 vs. activity C I group 4 | 0.346         | Yes     |
| activity C I group 4 vs. activity C I group 3 | 0.736         | Yes     |

| Comparison                          | Diff of Means | P<0.050 |
|-------------------------------------|---------------|---------|
| ANT C I group 1 vs. ANT C I group 3 | 0.72          | Yes     |
| ANT C I group 1 vs. ANT C I group 2 | 1.373         | Yes     |
| ANT C I group 1 vs. ANT C I group 4 | 0.344         | Yes     |
| ANT C I group 4 vs. ANT C I group 3 | 1.065         | Yes     |

| Comparison                            | Diff of Means | P<0.050 |
|---------------------------------------|---------------|---------|
| CyP-D C I group 1 vs. CyP-D I group 3 | 1.586         | Yes     |
| CyP-D C I group 1 vs. CyP-D I group 2 | 0.822         | Yes     |
| CyP-D I group 1 vs. CyP-D I group 4   | 1.079         | Yes     |
| CyP-D I group 4 vs. CyP-D I group 3   | 0.507         | Yes     |

| Comparison                            | Diff of Means | P<0.050 |
|---------------------------------------|---------------|---------|
| NDUF C I group 1 vs. NDUF C I group 3 | 0.318         | Yes     |
| NDUF C I group 1 vs. NDUF C I group 2 | 0.0366        | No      |
| NDUF C I group 1 vs. NDUF C I group 4 | 0.814         | No      |
| NDUF C I group 4 vs. NDUF C I group 3 | 0.147         | Yes     |

To Fig 6.

Activity IV complex

COX IV

MTCO1 IV complex

|        | group 1 | group 2 | group 3 | group 4 | group 1 | group 2 | group 3 | group 4 | group 1 | group 2 | group 3 | group 4 |
|--------|---------|---------|---------|---------|---------|---------|---------|---------|---------|---------|---------|---------|
| Mean 1 | 0,66    | 0,6534  | 0,462   | 0,858   | 1,123   | 1,0781  | 0,73    | 0,8984  | 3,13    | 3,1116  | 1,252   | 2,0345  |
| Mean 2 | 0,693   | 0,5808  | 0,4752  | 0,99    | 1,0332  | 1,0107  | 0,6513  | 0,8423  | 3,1926  | 3,0048  | 0,8451  | 2,4101  |
| Mean 3 | 0,6402  | 0,6468  | 0,4488  | 0,9438  | 1,1118  | 0,9882  | 0,685   | 0,9209  | 3,0987  | 3,0987  | 1,0016  | 2,0658  |
| Mean 4 | 0,7458  | 0,6072  | 0,5412  | 0,8316  | 1,1005  | 1,1455  | 0,8086  | 0,8759  | 3,2865  | 2,9109  | 1,3146  | 1,6276  |

1,1  
1,0  
0,9  
0,8  
0,7  
0,6  
0,5  
0,4

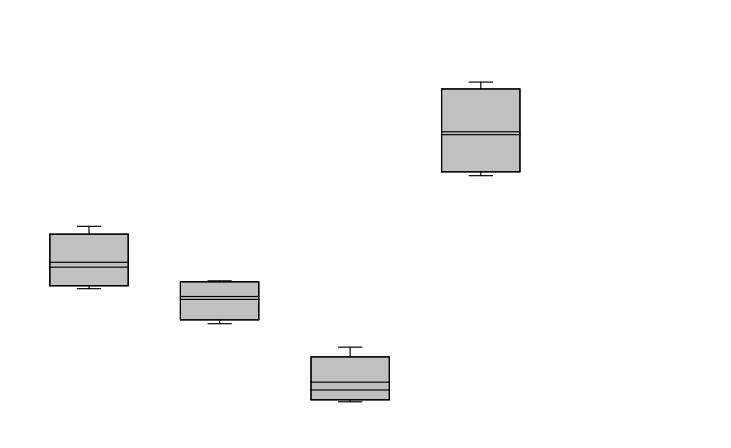

1,2  
1,1  
1,0  
0,9  
0,8  
0,7  
0,6

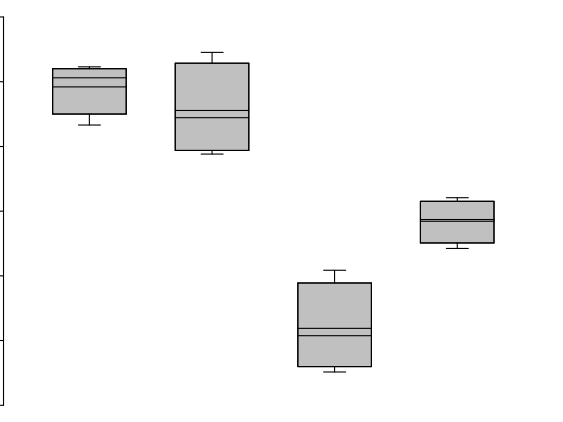

3,5  
3,0  
2,5  
2,0  
1,5  
1,0  
0,5

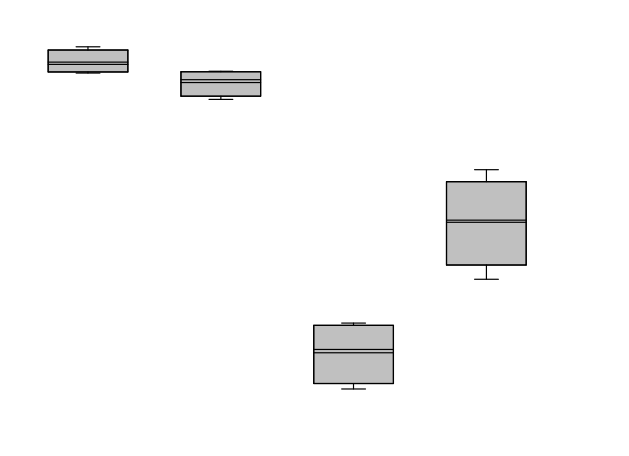

One Way Analysis of Variance All Pairwise Multiple Comparison Procedures (Student-Newman-Keuls Method) :

| Comparison                                      | Diff of Means | P<0.050 |
|-------------------------------------------------|---------------|---------|
| activity C IV group 1 vs. activity C IV group 3 | 0.203         | Yes     |
| activity C IV group 1 vs. activity C IV group 2 | 0.0627        | No      |
| activity C IV group 1 vs. activity C IV group 4 | 0.221         | Yes     |
| activity C IV group 4 vs. activity C IV group 3 | 0.424         | Yes     |

| Comparison                            | Diff of Means | P<0.050 |
|---------------------------------------|---------------|---------|
| COX C IV group 1 vs. COX C IV group 3 | 0.373         | Yes     |
| COX C IV group 1 vs. COX C IV group 2 | 0.0365        | No      |
| COX C IV group 1 vs. COX C IV group 4 | 0.11          | Yes     |
| COX C IV group 4 vs. COX C IV group 3 | 0.54          | Yes     |

| Comparison                                  | Diff of Means | P<0.050 |
|---------------------------------------------|---------------|---------|
| MTCO I C IV group 1 vs. MTCO I C IV group 3 | 2.074         | Yes     |
| MTCO I C IV group 1 vs. MTCO I C IV group 2 | 0.145         | No      |
| MTCO I C IV group 1 vs. MTCO I C IV group 4 | 1.142         | Yes     |
| MTCO I C IV group 4 vs. MTCO I C IV group 3 | 0.931         | Yes     |

To Fig 7.

Activity II complex

SDHB II complex

|        | group 1 | group 2 | group 3 | group 4 | group 1 | group 2 | group 3 | group 4 |
|--------|---------|---------|---------|---------|---------|---------|---------|---------|
| Mean 1 | 1,43    | 1,5344  | 1,144   | 1,4586  | 1,9602  | 1,98    | 1,5642  | 2,3364  |
| Mean 2 | 1,5873  | 1,3871  | 1,1011  | 1,4872  | 1,8018  | 2,1582  | 1,5642  | 2,4552  |
| Mean 3 | 1,4014  | 1,3728  | 1,0654  | 1,573   | 2,1384  | 2,075   | 1,6368  | 2,4156  |
| Mean 4 | 1,4586  | 1,5064  | 1,2584  | 1,3013  | 1,9998  | 1,8303  | 1,4078  | 2,5233  |

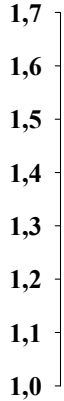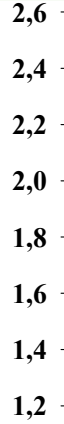

One Way Analysis of Variance All Pairwise Multiple Comparison Procedures (Student-Newman-Keuls Method) :

| Comparison                                      | Diff of Means | P<0.050 |
|-------------------------------------------------|---------------|---------|
| activity C II group 1 vs. activity C II group 3 | 0.327         | Yes     |
| activity C II group 1 vs. activity C II group 2 | 0.0192        | No      |
| activity C II group 1 vs. activity C II group 4 | 0.0143        | No      |
| activity C II group 4 vs. activity C II group 3 | 0.313         | Yes     |

| Comparison                              | Diff of Means | P<0.050 |
|-----------------------------------------|---------------|---------|
| SDHB C II group 1 vs. SDHB C II group 3 | 0.432         | Yes     |
| SDHB C II group 1 vs. SDHB C II group 2 | 0.0358        | No      |
| SDHB C II group 1 vs. SDHB C II group 4 | 0.458         | Yes     |
| SDHB C II group 4 vs. SDHB C II group 3 | 0.889         | Yes     |

To Fig 8.

CNPase III complex

UQCRC2 III complex

|        | group 1 | group 2 | group 3 | group 4 | group 1 | group 2 | group 3 | group 4 |
|--------|---------|---------|---------|---------|---------|---------|---------|---------|
| Mean 1 | 1,1123  | 0,8456  | 1,0099  | 1,452   | 1,6666  | 1,4787  | 0,9694  | 1,3458  |
| Mean 2 | 0,9922  | 0,9111  | 1,1235  | 1,4412  | 1,4951  | 1,5909  | 0,9365  | 1,2158  |
| Mean 3 | 0,9233  | 0,7666  | 1,1211  | 1,44    | 1,7044  | 1,5933  | 1,0296  | 1,283   |
| Mean 4 | 0,9455  | 0,7444  | 0,9444  | 1,5344  | 1,6594  | 1,5188  | 1,1682  | 1,2723  |

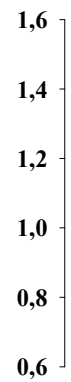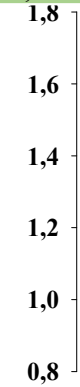

One Way Analysis of Variance All Pairwise Multiple Comparison Procedures (Student-Newman-Keuls Method) :

| Comparison                                    | Diff of Means | P<0.050 |
|-----------------------------------------------|---------------|---------|
| CNPase C III group 1 vs. CNPase C III group 3 | 0.0564        | No      |
| CNPase C III group 1 vs. CNPase C III group 2 | 0.176         | Yes     |
| CNPase C III group 1 vs. CNPase C III group 4 | 0.474         | Yes     |
| CNPase C III group 4 vs. CNPase C III group 3 | 0.417         | Yes     |

| Comparison                        | Diff of Means | P<0.050 |
|-----------------------------------|---------------|---------|
| UQCRC2 group 1 vs. UQCRC2 group 3 | 0.605         | Yes     |
| UQCRC2 group 1 vs. UQCRC2 group 2 | 0.086         | No      |
| UQCRC2 group 1 vs. UQCRC2 group 4 | 0.352         | Yes     |
| UQCRC2 group 4 vs. UQCRC2 group 3 | 0.253         | Yes     |

To Fig 9.

**Activity V complex**

**ATP5G V complex**

**ATP5F1 V complex**

**ATP5A V complex**

**Cyc D V complex**

|        | group 1 | group 2 | group 3 | group 4 | group 1 | group 2 | group 3 | group 4 | group 1 | group 2 | group 3 | group 4 | group 1 | group 2 | group 3 | group 4 | group 1 | group 2 | group 3 | group 4 |
|--------|---------|---------|---------|---------|---------|---------|---------|---------|---------|---------|---------|---------|---------|---------|---------|---------|---------|---------|---------|---------|
| Mean 1 | 1,6758  | 1,6416  | 1,1115  | 1,71    | 1,078   | 3,003   | 0,715   | 2,398   | 3,0586  | 3,0586  | 2,7465  | 3,7452  | 0,8026  | 0,913   | 0,332   | 1,2865  | 0,4998  | 0,4981  | 1,6044  | 0,4584  |
| Mean 2 | 1,6245  | 1,7955  | 1,2825  | 1,7784  | 1,144   | 3,586   | 0,792   | 2,068   | 2,9337  | 3,0898  | 2,6529  | 3,6828  | 0,913   | 0,9379  | 0,3054  | 1,4168  | 0,5197  | 0,5495  | 1,5929  | 0,4298  |
| Mean 3 | 1,7955  | 1,6758  | 1,368   | 1,539   | 1,309   | 3,652   | 0,847   | 2,068   | 3,2146  | 3,2771  | 2,7465  | 3,87    | 0,8275  | 0,9296  | 0,3287  | 1,3571  | 0,5776  | 0,6246  | 1,6445  | 0,4756  |
| Mean 4 | 1,7442  | 1,6929  | 1,3338  | 1,539   | 1,155   | 3,63    | 0,968   | 2,2     | 3,1453  | 3,121   | 2,528   | 3,7764  | 0,8034  | 1,0375  | 0,4059  | 1,3853  | 0,6406  | 0,6863  | 1,5414  | 0,4011  |

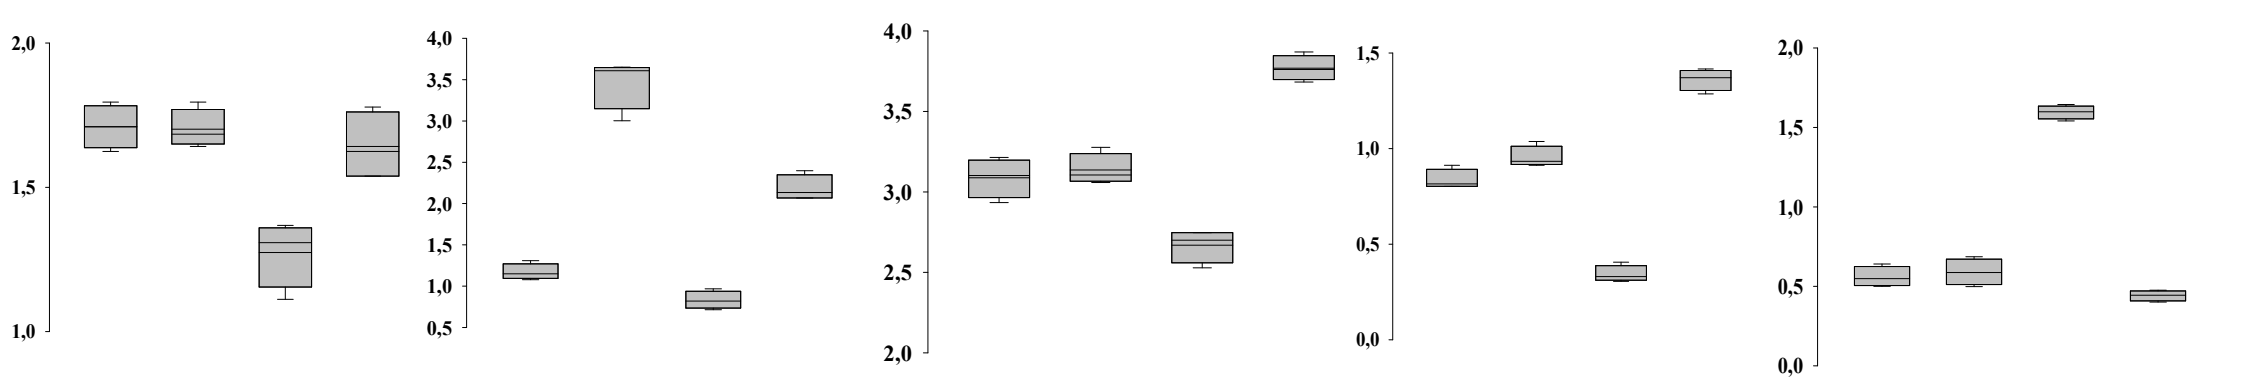

**One Way Analysis of Variance All Pairwise Multiple Comparison Procedures (Student-Newman-Keuls Method) :**

| Comparison                                    | Diff of Means | P<0.05 | Comparison                              | Diff of Means | P<0.05 | Comparison                              | Diff of Means | P<0.05 | Comparison                              | Diff of Means | P<0.05 |
|-----------------------------------------------|---------------|--------|-----------------------------------------|---------------|--------|-----------------------------------------|---------------|--------|-----------------------------------------|---------------|--------|
| Activity C V group 1 vs. Activity C V group 3 | 0.436         | Yes    | ATP5G C V group 1 vs. ATP5G C V group 3 | 1.626         | Yes    | ATP5F C V group 1 vs. ATP5F C V group 3 | 0.42          | Yes    | ATP5A C V group 1 vs. ATP5A C V group 3 | 0.494         | Yes    |
| Activity C V group 1 vs. Activity C V group 2 | 0.00855       | No     | ATP5G C V group 1 vs. ATP5G C V group 2 | 1.854         | Yes    | ATP5F C V group 1 vs. ATP5F C V group 2 | 0.0485        | No     | ATP5A C V group 1 vs. ATP5A C V group 2 | 0.118         | Yes    |
| Activity C V group 1 vs. Activity C V group 4 | 0.0684        | No     | ATP5G C V group 1 vs. ATP5G C V group 4 | 0.9524        | Yes    | ATP5F C V group 1 vs. ATP5F C V group 4 | 0.681         | Yes    | ATP5A C V group 1 vs. ATP5A C V group 4 | 0.525         | Yes    |
| Activity C V group 4 vs. Activity C V group 3 | 0.368         | Yes    | ATP5G C V group 4 vs. ATP5G C V group 3 | 0.998         | Yes    | ATP5F C V group 4 vs. ATP5F C V group 3 | 1.1           | Yes    | ATP5A C V group 4 vs. ATP5A C V group 3 | 1.018         | Yes    |
|                                               |               |        |                                         |               |        |                                         |               |        | CyP-D C V group 1 vs. CyP-D C V group 3 | 1.036         | Yes    |
|                                               |               |        |                                         |               |        |                                         |               |        | CyP-D C V group 1 vs. CyP-D C V group 2 | 0.0302        | No     |
|                                               |               |        |                                         |               |        |                                         |               |        | CyP-D C V group 1 vs. CyP-D C V group 4 | 0.118         | Yes    |
|                                               |               |        |                                         |               |        |                                         |               |        | CyP-D C V group 4 vs. CyP-D C V group 3 | 1.115         | Yes    |
